# Supplementary material
Source: publisher site journal article supplement (https://www.dovepress.com/article/247015)

## Supplemental Figure Legend

**Figure S1. Smad4 and its variants successfully recombinant expressed in A549 cells.** **A**, Representative images show Smad4 and its variants recombinant express in A549 cells in mRNA level as indicated. **B**, Representative images to show the Smad4 recombinant express in A549 cells in protein level as indicated. **C&D**, Bar graphs show the intensity-based quantification of Smad4 and its variants expression in A549 cells in mRNA level as indicated in panel A (C) and protein level protein level as indicated in panel B (D). n=3, Error bars: Mean±SD. \*P<0.05, \*\*\*P<0.005.

**A**M2000    Ctrl    Smad4     $\Delta 153-319$      $\Delta 95-287$      $\Delta 103-303$ 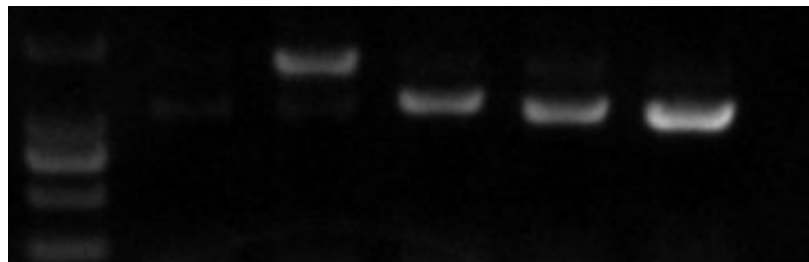**B**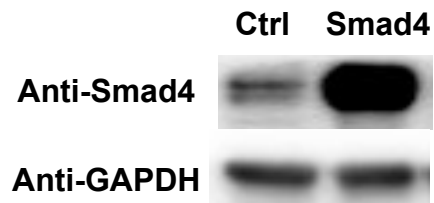**C**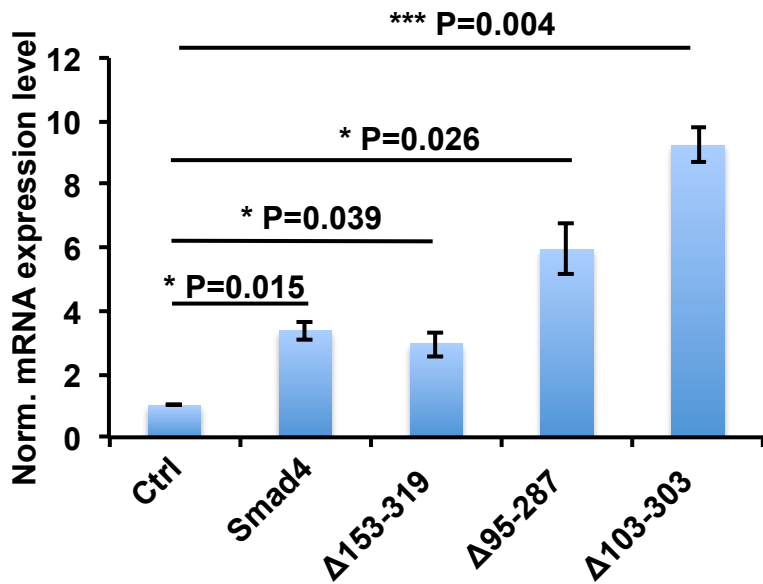**D**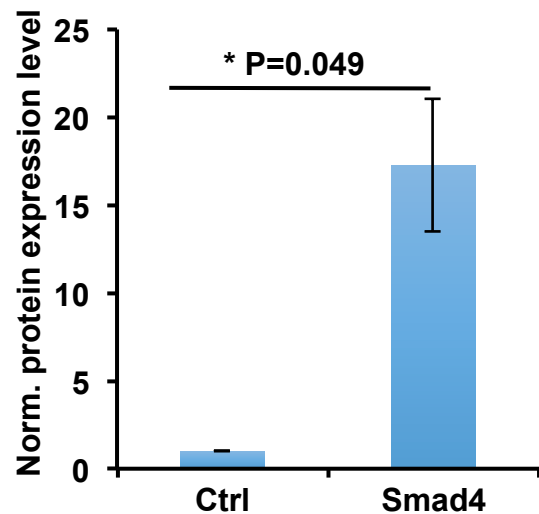

Supplement: Supplementary file 1 [file get_supplementary_file.php]
